## Heterogeneous migration of neuronal progenitors to the insula shapes the human brain

**Authors:** Arka N. Mallela, MD MS<sup>1</sup>; Hansen Deng MD; Ali Gholipour PhD<sup>2,3</sup>; Simon K Warfield PhD<sup>2,3</sup>; Ezequiel Goldschmidt MD, PhD<sup>2\*</sup>

1. Department of Neurological Surgery, University of Pittsburgh Medical Center, Pittsburgh, Pennsylvania, United States of America

2. Harvard Medical School, Boston, Massachusetts, United States of America

3 Boston Children's Hospital, Boston, Massachusetts, United States of America

4. Department of Neurological Surgery, University of California San Francisco, San Francisco, California, United States of America

Corresponding Author:

Ezequiel Goldschmidt MD, PhD

Assistant Professor, Department of Neurological Surgery

UCSF Weill Institute for Neurosciences

400 Parnassus Ave, Suite A808

San Francisco, CA 94143

tel: 412.313.4460

fax: 415.353.2889

email: [eze.goldschmidt@UCSF.edu](mailto:eze.goldschmidt@UCSF.edu)

Short title: Heterogenous migration to the insula

## ABSTRACT

### Background

The global geometry of the human cerebrum forms in a highly conserved fashion. Existing models of radial glial cell migration explain individual gyral formation but fail to explain both the global configuration of the cerebral lobes and the unique configuration of the insular gyri.

### Methods

To quantify the geometric differences in the insula, we calculated morphologic data in the insula and other lobes in both adults (N=107 adult subjects) and in a fetal brain atlas constructed from *in utero* brain MRIs of 81 healthy human fetuses (gestational age 21-38 weeks).

### Results

We find that the insula is morphologically different in adults and that these differences emerge during fetal development. Specifically, the insula exhibits shallower sulci ( $p < 0.0001$ ), less extrinsic curvature ( $p < 0.0001$ ), and less complex surface ( $p < 0.0001$ ) in adults and progressively throughout fetal development. *In utero*, the insular volume demonstrates logistic growth of an order of magnitude lower than the other lobes ( $\alpha = 0.002$  vs.  $0.05/0.03/0.04/0.02$ ) and a surface area that grows linearly, in contrast with the exponential growth of the other lobes, resulting in a significantly smaller insula in adults ( $p < 0.0001$ ). We demonstrate that the lenticular nuclei obstruct 60-70% of radial pathways from the ventricular zone (VZ) to the insula compared to the other lobes ( $p < 0.01$ ), forcing a curved or tangential migration path to the insula in contrast to the direct radial pathway from VZ to all other cortices. To validate this hypothesis, using fetal diffusion tractography, we identify streams of putative insular progenitor cells that originate from the VZ near the pallial-subpallial boundary and migrate tangentially *around* the lenticular nuclei to form the insula. Shape analysis confirms that these streams to the insula are quantitatively different with higher curl ( $p < 0.001$ ) and elongation ( $p < 0.001$ ).

### Conclusions

This alternative mechanism to direct radial migration can explain the altered morphology of the insula, the slow volumetric and surface area growth of the insula, and ultimately how the operculae overgrow the insula and create the global configuration of the human cerebrum.

**KEY WORDS:** brain folding; gyrification; insula; fetal MRI; Sylvian Fissure; brain development

## INTRODUCTION

The complex folding of the human cerebral cortex underlies its capacity for remarkable information processing, cognitive and sensorimotor functions. The characteristic gyral patterns observed in the cortex have been attributed to tangential expansion and long-distance radial migration along radial glial scaffolds.(1–3) Neural progenitors located in transient embryonic zones, including the ventricular zone (VZ) and subventricular zone (SVZ), proliferate and move across the intermediate zone through this scaffolding.(4–7) More recent observations suggest a possible two-step model of neurogenesis, first with radial glia undergoing asymmetric division in the VZ, followed by intermediate progenitor cells in the SVZ producing neurons through symmetric division.(8–11) The process of radial migration was previously thought to be complete by GA 24 weeks, but recent evidence suggests that this process continues after birth into infancy.(12)

While gyral formation through radial growth does characterize local folding, it does not explain the development of the global structure of the brain and the arrangement of the cerebral lobes. Landmark studies that have explored the mechanical process of gyrification have largely assumed a homogenous pattern growth of the brain.(13–15) Simulations *in silico* and in gel models suggest that constrained cortical expansion can lead to folding patterns that are similar to human sulci and gyri.(14, 16) However, these models largely do not account for the formation of the insula. Buried in the depths of the Sylvian fissure, the insula is involved in interoceptive function and interfaces with cortical and subcortical sensorimotor and limbic areas.(17) While the insula does have a stereotyped pattern of short and long gyri, insular gyri are shallower, straighter, and less complex compared to those of the cerebral convexity (18).

Moreover, in the convexity, the path from the ventricles to the cortex is unobstructed but a radial trajectory to the insula seems to be obstructed by deep gray matter nuclei.(19) Current models of radial growth fail to explain the unique morphology and position of the insula and the arrangement of the cerebral lobes around the Sylvian fissure.(20, 21)

Previously, we have shown that the Sylvian fissure forms through a unique process of folding compared with other sulci(22) and that these differences may be due to distinct transcriptional signatures in the insula vs. the opercula.(23) Given the anatomic and morphological differences of the insula, we hypothesized that the development of the insula does not follow the model of radial migration that forms the other lobes, and that the differences in the mechanisms driving insular and opercular growth determine the overall shape of the human brain. In this study, we quantify the morphologic differences between the insula and the other lobes in adults and identify that these differences emerge during fetal development. We then show that existing models of radial migration cannot explain the formation of the insula. In contrast, we identify a distinct curved and tangential migratory route of developing cells to the insular cortex, in contrast to radial pathways are found in all other lobes. This heterogeneity in radial migration yields different lobe volumes, folding pattern, and ultimately shapes the surface of the human brain.

## **RESULTS**

### *Adult insula anatomy*

Our investigation initially stemmed from the observation that the adult insula is anatomically and morphologically different than the other lobes of the brain.(18, 19) The insula

is covered by the frontal, temporal, and parietal operculae in the Sylvian fissure and is not apparent on the lateral cerebral surface of the adult brain (**Fig. 1a**). Furthermore, upon exposure, the sulci (and gyri) of the insula immediately appear to be shallower and less convoluted than those on the other lobes (**Fig. 1b**). We sought to quantify these differences. Using N=107 adult patients (54.2% female) of median age 28 (range 22-35) from the Human Connectome Project HCP 900 subjects data release(24), we quantified surface area (**Fig. 1d**), range from deepest sulcal fundus to most superficial gyral crown (sulcal depth range [SDR]) (**Fig. 1e**), extrinsic (mean) curvature (**Fig. 1f**), fractal dimension (FD) – a measure of surface complexity(25–27) (**Fig. 1g**), cortical thickness (**Fig. S2d**), and intrinsic (Gaussian) curvature (**Fig. S2f**). We found significant differences between the insula and other lobes (frontal, parietal, temporal and occipital) in all of these parameters. In particular, the insula had smaller surface area (surface area=26.7 vs. frontal 333.9/parietal 243.8/temporal 186.2/occipital 115.7 cm<sup>2</sup>, p<0.0001 pairwise against all lobes), shallower sulci (SDR=2.53 vs. 3.23/3.34/3.32/2.95 cm, p<0.0001), had less extrinsic curvature – (curvature=0.0 vs. 0.05/0.05/0.05/0.06 mm<sup>-1</sup>, p<0.0001), and less complex surface (FD=2.25 vs. 2.48/2.46/2.49/2.40, p<0.0001), than the other lobe. These findings were in concordance with the anatomic studies of the insula. To better understand this high dimensional dataset, we utilized UMAP (Uniform Manifold Approximation and Projection) to visualize these data, clearly demonstrating a separate clustering of the insula (**Fig. 1c**). As the insula is smaller in adults, surface area was not included in the UMAP to avoid biasing results.

### *Fetal insular development*

Given the differences in adult anatomy, we hypothesized that the unique morphology of the insula emerged *in utero*. To investigate this, we utilized the CRL fetal brain MRI atlas developed by Gholipour et al.(28) constructed from weekly fetal T2-weighted *in utero* MRI images of 81 healthy fetuses between 19 and 39 weeks of gestational age (GA). Unlike in the adult subjects, the insula is readily apparent on the lateral cortical surface during mid second trimester and progressively is covered by the frontal, parietal, and temporal opercula during the third trimester (**Fig. S1, Fig. 1h**). Moreover, visually, the insula remains relatively free of sulci and gyri until the appearance of the central sulcus of the insula until late in gestation, approximately at GA 36 weeks (**Fig. 1g**). This lent credence to our hypothesis that the differences in insula morphology emerged during gestation.

The morphological differences observed in adults were also found in developing fetal brain. Specifically, while the insula is similar in surface area to the other lobes at GA 21 weeks, it is significantly smaller than the other lobes by birth at GA 38 weeks ( $p < 0.0001$ ), concordant with adults (**Fig. 1k**). We used curve fitting to model the type of growth (logistic, exponential, linear) in surface area and other parameters. The surface area in all lobes grew exponentially except for the insula which grew linearly (**Table S2**). Sulcal depth range (**Fig. 1l**), extrinsic curvature (**Fig. 1m**), and fractal dimension (**Fig. 1n**) were all lower in the insula vs. the other lobes at GA 21 weeks and remained so during gestation until birth ( $p < 0.0001$ , linear regression against side, GA, and lobe). Interestingly, fractal dimension demonstrated an inflection point in all lobes at approximately GA 24 weeks but remained smaller in the insula. Unlike in the adult

cohort, intrinsic curvature and cortical thickness did not show significant differences by lobe during fetal development (**Fig. S2c, f**).

We also performed volumetric analysis by lobe during fetal development. Each lobe is associated with white matter that constitutes the bulk of the volume of that lobe. In contrast, the insula lacks a deep white matter and only has superficial white matter in the extreme capsule. In concordance with anatomic studies(19), we treated the central core of the brain (defined as the caudate nucleus, lenticular nuclei – putamen and globus pallidus, internal capsule) as the deep structures of the insula. The volume of the frontal lobe was 5.0 cc at 21 weeks and grew 8.5-fold to 42.7 cc at 38 weeks. Similarly, the temporal lobe grew 7-fold, the parietal lobe 7.5-fold, and the occipital lobe 7-fold. In contrast, the insula and central core grew from 1.8 cc at 21 weeks to only 9.2 cc at Week 38, a 5.1-fold absolute increase (**Fig. S2a**). Growth modeling revealed that all lobes exhibited logistic growth. However, the logistic growth rate  $\alpha$  was an order of magnitude lower in the insula and central core than the other lobes (0.002 vs. 0.05/0.03/0.04/0.02; **Table S2**). Growth in the central core was driven by deep gray matter - the caudate (0.6 to 1.5cc) and lenticular nuclei (0.5 to 2.5cc), white matter (0.3 to 1.9cc), and the insular cortex itself (0.4 to 3.3cc). (**Fig. S2b**).

To visualize this high dimensional dataset, we again utilized UMAP (excluding volume and surface area) to visualize the results by lobe (**Fig. 1j**). The insula clearly clustered differently than the other lobes. Moreover, the insula cluster diverges from the other lobes by gestational age. These analyses indicate that the morphological differences observed in the insula in adults emerge during fetal development.

### *Origin of insular progenitors*

The cerebral cortex emerges from radially migrating neural progenitors and radial expansion is at the center of sulcal morphogenesis.(12, 29) Progenitor cells travel from the ventricular zone (VZ) along radial glial cells by way of the subventricular zone (SVZ).(29) In the majority of the cerebrum, there is a direct path from the VZ/SVZ through developing white matter to the cortex. In contrast, there are several key deep gray matter structures that could obstruct direct radial migration of neural progenitor cells along radial glia from the VZ to the insula, particularly the developing globus pallidus and putamen (collectively lenticular nuclei) (**Fig. S1**).

We hypothesized that progenitor cells for each cortex traversed a linear path from the closest point in the ventricular zone but that the path to the insula is blocked by the lenticular nuclei, preventing a radial trajectory. We segmented the VZ by the closest lobe (in Euclidean distance) (**Fig. S3a**). The segmentation largely follows the expected anatomic course, with the VZ surrounding the frontal horn and body of the lateral ventricle corresponding to the frontal lobe, atrium to the parietal, occipital horn to the occipital, and temporal horn to the temporal. Only a thin strip along the inferolateral aspect of the frontal horn and superomedial aspect of the temporal horn segmented to the insula, constituting approximately 5% of VZ surface area, significantly lower than the other lobes ( $p < 0.001$ ; **Fig. S3c**). Euclidean distance from the VZ to the insula was also significantly higher than the other lobes ( $p < 0.0001$ ; **Fig. S3d**). We then



quantified the degree of obstruction (radial overlap) from subcortical structures to each lobe by sampling N=50 points from each VZ lobe segmentation at each GA (**Fig. S3b**).

To determine the degree of obstruction, we fixed a sphere at each putative origin point in the VZ and radially projected the locations of subcortical and cortical structures on this sphere. If a subcortical structure obstructs radial paths (for radial glial cells and neural progenitors) to a cortical structure, there will be high overlap in projection space and vice versa (**Fig. 2a-f** for explanation). The lenticular nuclei blocked up to 60-70% of radial paths from the VZ to the insula. Spherical overlap of the lenticular nuclei to the Insula (**Fig. 2g**) was significantly higher than that to other lobes (**Fig. 2h** – frontal lobes). The degree of spherical overlap was significantly lower in the frontal (-26.6% [-27.3 - -25.8],  $p < 0.01$ ), temporal (-30.0% [-31.2 - -29.7],  $p < 0.01$ ), parietal (-30.5% [-31.2 - -29.8],  $p < 0.01$ ), occipital (-30.2% [-31.0 - -29.5],  $p < 0.01$ ) lobes than in the insula across gestation (**Fig. 2i**). Due to the lenticular nuclei, there were few direct radial pathways from the VZ to the insular cortex in contrast to the abundant paths to other cortices. In contrast, the caudate nucleus did not block a significant portion of paths to any lobe (at most median 10% of frontal lobe paths; **Fig. S4a**) and the thalamus expectedly had a negligible degree of obstruction (**Fig. S4b**).

The spherical projection analysis indicated that all radial pathways from the VZ to the insula were obstructed by the lenticular nuclei. However, to rule out radial glia scaffolds traveling through the developing basal ganglia, we examined the DTI radially from GA 21-30 weeks at the subplate (approximated by the gray/white matter boundary surface in the Developing Human Connectome Pipeline). DTI radially measures the degree to which diffusion is radially oriented (e.g. perpendicular) to a given surface (**Fig. S5**).<sup>(30)</sup> After 30 weeks, radially

demonstrates a steady decline due to formation of association white matter, sulcation, and other processes (**Fig. S5d**), but prior to that, identifies the highly ordered anisotropic radial glial fascicles. Radiality at the frontal, parietal, temporal, and occipital lobes was almost 1.0 from GA 21 to 30 weeks, indicating perfect radial orientation of radial glial fascicles (**Fig. S5b**). In contrast, radiality was significantly lower along the insula ( $p < 0.001$ ), indicating an oblique direction of the glial scaffold along which progenitor cell streams could migrate (**Fig. 3e, h; Fig. S5c**). Per the spherical projection and DTI radiality analyses, the lenticular nuclei block a direct radial path from the VZ to the insula in contrast to direct unobstructed paths to the other lobes.

#### *The curved radial glial fascicle to the insula*

The preceding analysis indicates that there is not a direct radial path to the insula. Accordingly, we used diffusion tractography to identify radial glial fascicles to the insula and compare them to those to the other lobes. Diffusion tractography identified radially oriented glial scaffolds originating in the VZ and ending in the frontal, parietal, temporal, and occipital cortices (**Fig. 3b, d**). While diffusion imaging does identify that type of fiber inducing restricted water diffusion, the radial orientation and origin of these fibers identifies them as radial glial fascicles. In contrast to the other lobes, the fibers to the insula were either curved around the lenticular nuclei (**Fig. 3a**) or traveling obliquely from the temporal VZ to the posterior insula. We quantified the degree of difference between insular radial glial fascicles and the other lobes using shape analysis.<sup>(31)</sup> Fibers to the insula had significantly higher curl ( $p < 0.001$ ; **Fig. 3f**) and elongation ( $p < 0.0001$ ; **Fig. 3g**), as well as smaller diameter, shorter length, and smaller span ( $p < 0.001$ ; **Fig. S6b-d**). While mean tract fractional anisotropy was not significantly different

between the insula and other lobes (**Fig. S6a**), in isolation it is difficult to interpret the tissue composition of these tracts.

Per our analysis, a different migratory stream curving around the lenticular nucleus or traveling obliquely from the temporal VZ forms the insula in contrast to the direct radial glial fascicles to the other lobes.

## DISCUSSION

During the second and third trimesters, the cerebral cortex expands from a smooth telencephalic vesicle to a folded surface with a well-defined pattern of lobes and conserved sulci and gyri.(32, 33) While existing physical models of brain folding(14–16, 34, 35) can explain the formation of the typical gyrus and sulcus, the formation of the global geometry of the brain and specific lobes remains unexplained. Moreover, recent evidence suggests that the Sylvian fissure forms by an alternative process than other sulci(22, 23), motivating the need for a better understanding of the development of the cerebrum as a whole.

At the center of the developing brain is the insula. Buried in the depths of the Sylvian fissure, the insula has unique morphology(18, 19), cytoarchitecture(17, 36), and functional organization(37) as compared to the other lobes. Indeed, these differences are so pronounced that almost all accounts of gyral/sulcal development specifically exclude the insula from their analyses.(15, 30, 35) Radial migration models(16) do not explain the geometry of insular gyri nor the overall configuration of the cerebrum. The anomalous nature of insular development suggest that fundamentally different processes are involved.

This study quantitatively establishes that the insula has different morphology than the other lobes in adults and demonstrate that these differences emerge during fetal development (**Fig. 1**). Specifically, the insular cortex expands at a slower rate than any other brain lobe and has a unique gyral arrangement and morphology, different than the resulted geometry from radial migration models(12, 14–16, 34, 35). We then establish a novel mechanism by which these differences emerge. Using a novel spherical projection method (**Fig. 2**), we describe how the lenticular nuclei directly obstruct a radial pathway between the ventricular zone and most of the insular cortex throughout gestation, a relationship that is not observed for the other lobes. Finally, using fetal diffusion imaging (**Fig. 3**), we demonstrate that a curved fascicle travels *around* the lenticular nuclei to the insula and another tangentially traveling fascicle travels to the posterior insula from the temporal VZ (**Fig. 4**). Fetal diffusion imaging is still in its infancy (30), but our regional comparative analysis demonstrates that glial scaffolding for migrating progenitor cells forms around but not through the lenticular nuclei to the insula, a new finding that aligns with other results presented here.

Our results indicate that the brain does not grow homogeneously. The central core and insular cortex are developmental outliers. The opercula receive radial migration from the ventricular zone and grow at a faster rate than the neighboring insula and central core, resulting in deep, convoluted gyri. In contrast, a curved and tangential glial fascicle travels from the VZ, around the lenticular zone, to the insula (**Fig. 4**). Accordingly, the insular folds have little in common with their equivalents on the cerebral convexity and the insula and the central core expand a much slower rate. The rapidly expanding operculae overgrow the insula and close the Sylvian fissure, analogous to the way a muffin top overgrows the stump. As we have shown

before, the formation of the Sylvian fissure follows different principles compared to the development of any other brain fold and that singularity explains why arteries do not cross the Sylvian fissure.(22, 23, 38) Those findings are confirmed by the results of this paper.

The putative origin of insular progenitors indicated by this analysis (**Fig. 4; Fig. S3A**) corresponds to the pallial/subpallial boundary, the interface zone between the ganglionic eminence, which originates tangentially migrating neurons, and the ventricular zone, which originates radially migrating cortical progenitors.(2, 39) While tangential migration from the ganglionic eminences themselves has been identified (6, 40, 41), Gonzalez-Arnay et al hypothesized that this area of the ventricular zone between the pallium and the sub-pallium generates insular progenitors that migrate tangentially.(42) Our findings confirm this hypothesis. The pallial-subpallial boundary is well positioned for progenitor migration around the basal ganglia. Furthermore, cells at this boundary are genetically distinct from the pallium which may additionally contribute to morphological differences in gyri.(43) Finally, the subpallium is a source of numerous structures with strong reciprocal connections with the insula(44) and may exhibit a strong influence on cortical development including the insula.(43) The close proximity of the pallial-subpallial boundary to putative insular progenitors may facilitate this process.

As longitudinal collection of fetal brain specimens from the same individual is logically impossible, fetal MR imaging is an optimal tool to study the still open problem of human brain folding. However, further work in fetal brain specimens may further validate these results.

## CONCLUSION

We identify a new model of insular development in contrast to direct radial migration. Unlike the other lobes, the insula forms from curved and tangential migratory streams that travel around the lenticular nuclei and from the temporal ventricular zone. This yields different gyral geometry and lower growth rate in the insula and shapes the global geometry of the cerebrum.

## References

1. P. Rakic, Mode of cell migration to the superficial layers of fetal monkey neocortex. *The Journal of Comparative Neurology*. **145** (1972), pp. 61–83.
2. P. Rakic, Specification of cerebral cortical areas. *Science*. **241** (1988), pp. 170–176.
3. P. Rakic, Evolution of the neocortex: a perspective from developmental biology. *Nat. Rev. Neurosci.* **10**, 724–735 (2009).
4. I. Reillo, C. de Juan Romero, M. Á. García-Cabezas, V. Borrell, A role for intermediate radial glia in the tangential expansion of the mammalian cerebral cortex. *Cereb. Cortex*. **21**, 1674–1694 (2011).
5. I. Bystron, P. Rakic, Z. Molnár, C. Blakemore, The first neurons of the human cerebral cortex. *Nature Neuroscience*. **9** (2006), pp. 880–886.
6. O. Marín, J. L. R. Rubenstein, A long, remarkable journey: Tangential migration in the telencephalon. *Nature Reviews Neuroscience*. **2** (2001), pp. 780–790.
7. S. C. Noctor, A. C. Flint, T. A. Weissman, R. S. Dammerman, A. R. Kriegstein, Neurons derived from radial glial cells establish radial units in neocortex. *Nature*. **409** (2001), pp. 714–720.
8. A. Kriegstein, S. Noctor, V. Martínez-Cerdeño, Patterns of neural stem and progenitor cell division may underlie evolutionary cortical expansion. *Nature Reviews Neuroscience*. **7** (2006), pp. 883–890.
9. S. C. Noctor, V. Martínez-Cerdeño, L. Ivic, A. R. Kriegstein, Cortical neurons arise in symmetric and asymmetric division zones and migrate through specific phases. *Nature Neuroscience*. **7** (2004), pp. 136–144.
10. A. Chenn, C. A. Walsh, Regulation of cerebral cortical size by control of cell cycle exit in neural precursors. *Science*. **297**, 365–369 (2002).
11. T. Sun, R. F. Hevner, Growth and folding of the mammalian cerebral cortex: from molecules to malformations. *Nat. Rev. Neurosci.* **15**, 217–232 (2014).
12. M. F. Paredes, D. James, S. Gil-Perotin, H. Kim, J. A. Cotter, C. Ng, K. Sandoval, D. H. Rowitch, D. Xu, P. S. McQuillen, J. M. Garcia-Verdugo, E. J. Huang, A. Alvarez-Buylla, Extensive migration of young neurons into the infant human frontal lobe. *Science*. **354** (2016), doi:10.1126/science.aaf7073.
13. E. Armstrong, A. Schleicher, H. Omran, M. Curtis, K. Zilles, The ontogeny of human gyrification. *Cereb. Cortex*. **5**, 56–63 (1995).
14. T. Tallinen, J. Y. Chung, F. Rousseau, N. Girard, J. Lefèvre, L. Mahadevan, On the growth and form of cortical convolutions. *Nature Physics*. **12** (2016), pp. 588–593.
15. D. C. Van Essen, A tension-based theory of morphogenesis and compact wiring in the central nervous system. *Nature*. **385**, 313–318 (1997).
16. T. Tallinen, J. Y. Chung, J. S. Biggins, L. Mahadevan, Gyrification from constrained cortical expansion. *Proc. Natl. Acad. Sci. U. S. A.* **111**, 12667–12672 (2014).

17. H. C. Evrard, The organization of the primate insular cortex. *Frontiers in Neuroanatomy*. **13** (2019), p. 43.
18. U. Türe, D. C. H. Yaşargil, O. Al-Mefty, M. G. Yaşargil, Topographic anatomy of the insular region. *J. Neurosurg.* **90**, 720–733 (1999).
19. E. C. Ribas, K. Yagmurlu, E. De Oliveira, G. C. Ribas, A. Rhoton, Microsurgical anatomy of the central core of the brain. *J. Neurosurg.* **129**, 752–769 (2018).
20. C. Garel, M. Elmaleh, E. Chantrel, G. Sebag, H. Brisse, Fetal MRI: normal gestational landmarks for cerebral biometry, gyration and myelination. *Child's Nervous System*. **19** (2003), pp. 422–425.
21. A. Afif, R. Bouvier, A. Buenerd, J. Trouillas, P. Mertens, Development of the human fetal insular cortex: study of the gyration from 13 to 28 gestational weeks. *Brain Structure and Function*. **212** (2007), pp. 335–346.
22. A. N. Mallela, H. Deng, A. Bush, E. Goldschmidt, Different Principles Govern Different Scales of Brain Folding. *Cerebral Cortex*. **30** (2020), pp. 4938–4948.
23. A. N. Mallela, H. Deng, A. K. Brisbin, A. Bush, E. Goldschmidt, Sylvian fissure development is linked to differential genetic expression in the pre-folded brain. *Sci. Rep.* **10**, 14489 (2020).
24. D. C. Van Essen, S. M. Smith, D. M. Barch, T. E. J. Behrens, E. Yacoub, K. Ugurbil, WU-Minn HCP Consortium, The WU-Minn Human Connectome Project: an overview. *Neuroimage*. **80**, 62–79 (2013).
25. C. R. Madan, E. A. Kensinger, Cortical complexity as a measure of age-related brain atrophy. *Neuroimage*. **134**, 617–629 (2016).
26. P. M. Thompson, C. Schwartz, R. T. Lin, A. A. Khan, A. W. Toga, Three-dimensional statistical analysis of sulcal variability in the human brain. *Journal of Neuroscience*. **16**, 4261–4274 (1996).
27. K. Im, J.-M. Lee, U. Yoon, Y.-W. Shin, S. B. Hong, I. Y. Kim, J. S. Kwon, S. I. Kim, Fractal dimension in human cortical surface: Multiple regression analysis with cortical thickness, sulcal depth, and folding area. *Hum. Brain Mapp.* **27**, 994–1003 (2006).
28. A. Gholipour, C. K. Rollins, C. Velasco-Annis, A. Ouaalam, A. Akhondi-Asl, O. Afacan, C. M. Ortinau, S. Clancy, C. Limperopoulos, E. Yang, J. A. Estroff, S. K. Warfield, A normative spatiotemporal MRI atlas of the fetal brain for automatic segmentation and analysis of early brain growth. *Sci. Rep.* **7**, 476 (2017).
29. V. Fernández, C. Llinares-Benadero, V. Borrell, Cerebral cortex expansion and folding: what have we learned? *EMBO J.* **35**, 1021–1044 (2016).
30. Z. Eaton-Rosen, B. Scherrer, A. Melbourne, S. Ourselin, J. J. Neil, S. K. Warfield, Investigating the maturation of microstructure and radial orientation in the preterm human cortex with diffusion MRI. *Neuroimage*. **162**, 65–72 (2017).
31. F. C. Yeh, Shape analysis of the human association pathways. *Neuroimage*. **223**, 117329 (2020).



32. V. Borrell, How Cells Fold the Cerebral Cortex. *J. Neurosci.* **38**, 776–783 (2018).
33. C. D. Kroenke, P. V. Bayly, How forces fold the cerebral cortex. *Journal of Neuroscience.* **38**, 767–775 (2018).
34. K. E. Garcia, C. D. Kroenke, P. V. Bayly, Mechanics of cortical folding: Stress, growth and stability. *Philosophical Transactions of the Royal Society B: Biological Sciences.* **373** (2018), , doi:10.1098/rstb.2017.0321.
35. J. Hill, T. Inder, J. Neil, D. Dierker, J. Harwell, D. Van Essen, Similar patterns of cortical expansion during human development and evolution. *Proc. Natl. Acad. Sci. U. S. A.* **107**, 13135–13140 (2010).
36. A. L. Bauernfeind, A. A. de Sousa, T. Avasthi, S. D. Dobson, M. A. Raghanti, A. H. Lewandowski, K. Zilles, K. Semendeferi, J. M. Allman, A. D. B. Craig, P. R. Hof, C. C. Sherwood, A volumetric comparison of the insular cortex and its subregions in primates. *J. Hum. Evol.* **64**, 263–279 (2013).
37. A. Jezzini, F. Caruana, I. Stoianov, V. Gallese, G. Rizzolatti, Functional organization of the insula and inner perisylvian regions. *Proc. Natl. Acad. Sci. U. S. A.* **109**, 10077–10082 (2012).
38. D. E. Shalom, M. A. Trevisan, A. Mallela, M. Nuñez, E. Goldschmidt, Brain folding shapes the branching pattern of the middle cerebral artery. *PLoS One.* **16** (2021), doi:10.1371/journal.pone.0245167.
39. F. Encha-Razavi, P. Sonigo, Features of the developing brain. *Childs. Nerv. Syst.* **19**, 426–428 (2003).
40. J. G. Corbin, S. Nery, G. Fishell, Telencephalic cells take a tangent: non-radial migration in the mammalian forebrain. *Nat. Neurosci.* **4 Suppl**, 1177–1182 (2001).
41. M. Rallu, J. G. Corbin, G. Fishell, Parsing the prosencephalon. *Nat. Rev. Neurosci.* **3**, 943–951 (2002).
42. E. González-Arnay, M. González-Gómez, G. Meyer, A Radial Glia Fascicle Leads Principal Neurons from the Pallial-Subpallial Boundary into the Developing Human Insula. *Front. Neuroanat.* **11**, 111 (2017).
43. N. Moreno, A. González, S. Rétaux, Development and evolution of the subpallium. *Semin. Cell Dev. Biol.* **20**, 735–743 (2009).
44. J. Ghaziri, A. Tucholka, G. Girard, O. Boucher, J.-C. Houde, M. Descoteaux, S. Obaid, G. Gilbert, I. Rouleau, D. K. Nguyen, Subcortical structural connectivity of insular subregions. *Sci. Rep.* **8**, 8596 (2018).
45. S. Khan, L. Vasung, B. Marami, C. K. Rollins, O. Afacan, C. M. Ortinau, E. Yang, S. K. Warfield, A. Gholipour, Fetal brain growth portrayed by a spatiotemporal diffusion tensor MRI atlas computed from in utero images. *Neuroimage.* **185**, 593–608 (2019).
46. A. Gholipour, C. Limperopoulos, S. Clancy, C. Clouchoux, A. Akhondi-Asl, J. A. Estroff, S. K. Warfield, Construction of a deformable spatiotemporal MRI atlas of the fetal brain: evaluation of similarity metrics and deformation models. *Med. Image Comput. Comput. Assist. Interv.* **17**, 292–299 (2014).

47. I. S. Gousias, A. Hammers, S. J. Counsell, L. Srinivasan, M. A. Rutherford, R. A. Heckemann, J. V. Hajnal, D. Rueckert, A. D. Edwards, Magnetic Resonance Imaging of the Newborn Brain: Automatic Segmentation of Brain Images into 50 Anatomical Regions. *PLoS One*. **8** (2013), doi:10.1371/journal.pone.0059990.
48. I. S. Gousias, A. D. Edwards, M. A. Rutherford, S. J. Counsell, J. V. Hajnal, D. Rueckert, A. Hammers, Magnetic resonance imaging of the newborn brain: manual segmentation of labelled atlases in term-born and preterm infants. *Neuroimage*. **62**, 1499–1509 (2012).
49. B. Marami, S. S. Mohseni Salehi, O. Afacan, B. Scherrer, C. K. Rollins, E. Yang, J. A. Estroff, S. K. Warfield, A. Gholipour, Temporal slice registration and robust diffusion-tensor reconstruction for improved fetal brain structural connectivity analysis. *Neuroimage*. **156**, 475–488 (2017).
50. R. S. Desikan, F. Ségonne, B. Fischl, B. T. Quinn, B. C. Dickerson, D. Blacker, R. L. Buckner, A. M. Dale, R. P. Maguire, B. T. Hyman, M. S. Albert, R. J. Killiany, An automated labeling system for subdividing the human cerebral cortex on MRI scans into gyral based regions of interest. *Neuroimage*. **31**, 968–980 (2006).
51. A. Makropoulos, E. C. Robinson, A. Schuh, R. Wright, S. Fitzgibbon, J. Bozek, S. J. Counsell, J. Steinweg, K. Vecchiato, J. Passerat-Palmbach, G. Lenz, F. Mortari, T. Tenev, E. P. Duff, M. Bastiani, L. Cordero-Grande, E. Hughes, N. Tumor, J.-D. Tournier, J. Hutter, A. N. Price, R. P. A. G. Teixeira, M. Murgasova, S. Victor, C. Kelly, M. A. Rutherford, S. M. Smith, A. D. Edwards, J. V. Hajnal, M. Jenkinson, D. Rueckert, The developing human connectome project: A minimal processing pipeline for neonatal cortical surface reconstruction. *Neuroimage*. **173**, 88–112 (2018).
52. L. McInnes, J. Healy, J. Melville, UMAP: Uniform Manifold Approximation and Projection for Dimension Reduction. *arXiv [stat.ML]* (2018), (available at <http://arxiv.org/abs/1802.03426>).
53. F. C. Yeh, T. D. Verstynen, Y. Wang, J. C. Fernández-Miranda, W. Y. Tseng, Deterministic diffusion fiber tracking improved by quantitative anisotropy. *PLoS One*. **8** (2013), doi:10.1371/JOURNAL.PONE.0080713.
54. M. Jenkinson, P. Bannister, M. Brady, S. Smith, Improved optimization for the robust and accurate linear registration and motion correction of brain images. *Neuroimage*. **17**, 825–841 (2002).
55. P. A. Yushkevich, J. Piven, H. C. Hazlett, R. G. Smith, S. Ho, J. C. Gee, G. Gerig, User-guided 3D active contour segmentation of anatomical structures: significantly improved efficiency and reliability. *Neuroimage*. **31**, 1116–1128 (2006).

## Acknowledgements

Data were provided [in part] by the Human Connectome Project, WU-Minn Consortium (Principal Investigators: David Van Essen and Kamil Ugurbil; 1U54MH091657) funded by the 16 NIH Institutes and Centers that support the NIH Blueprint for Neuroscience Research; and by the McDonnell Center for Systems Neuroscience at Washington University."

In addition, the authors would like to thank the authors of Gholipour et al.(28) and Khan et al.(45) for graciously sharing their atlases online and for providing diffusion tensors.

## Funding

American Association of Neurological Surgeons – Van Wagenen Fellowship and Grant (EG)  
Burroughs Wellcome Fund Physician-Scientist Institutional Award (ANM)  
National Institutes of Health 1F32DC020644-01 (ANM)  
National Institutes of Health R01 EB013248 (AG, SKW)  
National Institutes of Health R01 NS106030 (AG, SKW)  
National Institutes of Health R01 EB031849 (AG, SKW)  
National Institutes of Health R01 EB032366 (AG, SKW)  
National Institutes of Health R01 HD109395 (AG, SKW)  
National Institutes of Health S10 OD0250111 (AG, SKW)  
McKnight Foundation – Technological Innovations in Neuroscience (AG, SKW)

The content of this publication is solely the responsibility of the authors and does not necessarily represent the official views of the NIH, McKnight Foundation, American Association of Neurological Surgeons, or the Burroughs Wellcome Fund.

## Author Contributions

Conceptualization: ANM, EG  
Data analysis: ANM, HD  
Additional data + analyses: AG, SKW  
Supervision: EG  
Writing – original draft: ANM, HD, EG  
Writing – review & editing: ANM, EG, HD, AG, SKW

## Competing Interests

The authors declare no competing interests

## Data and materials availability

Python and R code is publicly available for review at [http://github.com/mallelaan/brain\\_development](http://github.com/mallelaan/brain_development). Fetal data is publicly available for download from [http://crl.med.harvard.edu/research/fetal\\_brain\\_atlas/](http://crl.med.harvard.edu/research/fetal_brain_atlas/). Diffusion tensors can be obtained from the authors of Khan et al. upon request. Adult data can be obtained from <https://www.humanconnectome.org/study/hcp-young-adult/document/900-subjects-data-release> using the subject IDs specified in **Table S1**.

## Figure Legends

**Figure 1: The insula is morphologically different in adults and these differences emerge during fetal development.** **a:** Adult pial surface. The convoluted surface of the frontal (blue), parietal (green), temporal (orange), and occipital (red) lobes stands in stark contrast to that of the insula. In unexpanded view, the insula is entirely covered by the frontal, parietal, and temporal operculae. **b:** Anatomic specimen demonstrating insula and surrounding operculae. After retractors are placed, the convoluted gyration of the frontal and temporal contrast to the relatively shallow and straight gyri of the insula. White arrow – central sulcus of insula. **c:** UMAP of cortical surface metrics (cortical thickness, sulcal depth range, mean curvature, fractal dimension) in N=107 adult subjects. The insula clusters separately. UMAP parameters: # of neighbors = 20, minimum distance = 0.7, seed = 281. **d:** Total surface area by lobe. Linear regression against side and lobe was significant with high overall fit ( $R^2 = 0.983$ ,  $F(6,1064)=16460$ ,  $p<0.0001$ ). Median surface area in the frontal ( $339.9 \text{ cm}^2$ ;  $p < 0.0001$ ), parietal ( $243.8 \text{ cm}^2$ ;  $p < 0.0001$ ), temporal ( $186.2 \text{ cm}^2$ ;  $p < 0.0001$ ), and occipital ( $115.7 \text{ cm}^2$ ;  $p < 0.0001$ ) cortices was significantly higher than the insula ( $26.7 \text{ cm}^2$ ), using pair-wise Mann-Whitney testing with Bonferroni correction. **e:** Sulcal depth range (SDR) - range from deepest sulcal fundus to most superficial gyral crown, by lobe. Linear regression against side and lobe was significant with high overall fit ( $R^2 = 0.997$ ,  $F(6,1064)=61070$ ,  $p<0.0001$ ). Median SDR in the frontal (3.23 cm;  $p < 0.0001$ ), parietal (3.34 cm;  $p < 0.0001$ ), temporal (3.32 cm;  $p < 0.0001$ ), and occipital (2.95 cm;  $p < 0.0001$ ) cortices was significantly higher than the insula (2.53 cm). **f:** Extrinsic (mean) curvature by lobe. Linear regression against side and lobe was significant with high overall fit ( $R^2 = 0.973$ ,  $F(6,1064)=6501$ ,  $p<0.0001$ ). Median curvature in the frontal ( $0.05 \text{ mm}^{-1}$ ;  $p < 0.0001$ ), parietal ( $0.05 \text{ mm}^{-1}$ ;  $p < 0.0001$ ), temporal ( $0.05 \text{ mm}^{-1}$ ;  $p < 0.0001$ ), and occipital ( $0.06 \text{ mm}^{-1}$ ;  $p < 0.0001$ ) cortices was significantly higher than the insula ( $0.0 \text{ mm}^{-1}$ ). **g:** Fractal dimension (FD) by lobe. Linear regression against side and lobe was significant with high overall fit ( $R^2 = 1.00$ ,  $F(6,1064)=503400$ ,  $p<0.0001$ ). Median FD in the frontal (2.48;  $p < 0.0001$ ), parietal (2.46;  $p < 0.0001$ ), temporal (2.49;  $p < 0.0001$ ), and occipital (2.40;  $p < 0.0001$ ) cortices was significantly higher than the insula (2.25). \*\*\* -  $p < 0.0001$  (Mann-Whitney Test – lobe vs. Insula, Bonferroni corrected) **h:** Pial surface of the left hemisphere at GA 24 weeks from the CRL fetal brain MRI atlas. **i:** Pial surface of the left hemisphere at GA 36 weeks. The frontal, temporal, parietal, and occipital lobes have developed significant gyri and sulci and the operculae have begun to cover the insula. In contrast the insula remains largely flat and devoid of significant sulci, except for the shallow central sulcus of the insula (white arrow), which appears at GA 35-36 weeks. **j:** UMAP of cortical surface metrics (cortical thickness, sulcal depth range, mean curvature, and fractal dimension) across fetal development. Larger circles indicate later stages in development. Lobe volume and surface area are excluded. The insula takes a different trajectory than the other lobes. UMAP parameters: # of neighbors = 75, minimum distance = 0.4, seed = 74. **k:** Surface area by lobe by GA. Surface area grows exponentially for frontal, temporal, parietal, and occipital lobes, but linearly in the insula (Supplementary Table 2). Linear regression against side, GA, and lobe was significant with good overall fit ( $R^2 = 0.841$ ,  $F(6,173)=159.0$ ,  $p<0.0001$ ). Surface area was significantly higher in the frontal, parietal, temporal, and occipital cortices than the insula ( $p < 0.001$ ). **l:** Sulcal depth range by GA. Linear regression against side, GA, and lobe was significant with good overall fit ( $R^2 = 0.927$ ,

$F(6,173)=377.5$ ,  $p<0.0001$ ). SDR was significantly higher in the frontal, parietal, temporal, and occipital cortices than the insula ( $p < 0.001$ ). **m**: Extrinsic (mean) curvature by GA. Linear regression against side, GA, and lobe was significant with moderate fit ( $R^2 = 0.487$ ,  $F(6,173)=29.33$ ,  $p<0.0001$ ). Curvature was significantly higher in the frontal, parietal, temporal, and occipital cortices than the insula ( $p < 0.001$ ). **n**: Fractal dimension by GA. Linear regression against side, GA, and lobe was significant with good overall fit ( $R^2 = 0.852$ ,  $F(6,173)=173.3$ ,  $p<0.0001$ ). FD was significantly higher in the frontal, parietal, temporal, and occipital cortices than the insula ( $p < 0.001$ ).

**Figure 2. The lenticular nuclei obstruct a direct radial pathway from the ventricular zone to the insula.** We developed a spherical projection analysis that determined the degree to which subcortical structures obstruct direct radial migration of radial glial cells from the ventricular zone to the cortical surface. High overlap indicates that radial pathways are obstructed. **First row (a-c)**: Toy example using spheres. **a**: 3D visualization from the center point (*white ball and white arrow*). **b**: Axial plane – note that the red sphere is out of plane and not visualized. **c**: Spherical projection plot – the center point is at the center of the plot. Note that spherical projection warps the shape but not the solid angle taken up by a given region of interest. **Second row (d-f)**: Example using the left side at gestational week 30. The center point is the ipsilateral foramen of Monro (*white ball and white arrow*). **d**: 3D visualization looking medial to lateral at the left hemisphere. **e**: Axial projection – note that the lenticular nuclei (gray) largely overlap the solid angle subtended by the insula **f**: Spherical projection plot. Insula and thalamus are not displayed for clarity.

We determined the spherical overlap of subcortical structures with the VZ origin of each lobe. **g**: The lenticular nuclei (gray) overlap the majority of the pathways to the insula surface. *Left*: GA 24, *Right*: GA 30. **h**: The lenticular nuclei overlap a small proportion of the frontal lobe. **i**: Spherical overlap for each sample (dots) and median overlap by lobes (lines) by GA. The lenticular nuclei overlaps the insula significantly more than the other lobes. Linear regression against side, GA, and lobe was significant but with moderate overall fit ( $R^2 = 0.674$ ,  $F(6,4842)=1672$ ,  $p<0.0001$ ). The proportion of spherical overlap was significantly lower in the frontal (-26.6% [-27.3 - -25.8],  $p < 0.01$ ), temporal (-30.0% [-31.2 - -29.7],  $p < 0.01$ ), parietal (-30.5% [-31.2 - -29.8],  $p < 0.01$ ), occipital (-30.2% [-31.0 - -29.5],  $p < 0.01$ ) lobes than in the insula. GA had a negligible effect on overlap.

**Figure 3: Fetal diffusion imaging demonstrates curved and oblique radial glial fascicles to insula.** **a**: Diffusion tractography (anterior coronal view) demonstrating putative radial glial fascicles (light blue tractography) originating from the ventricular zone to the insula (light blue). The fascicles curve around the lenticular nuclei (red) to reach the insula. All diffusion tractography images in this figure are at GA 23 weeks. **b**: Diffusion tractography (anterior coronal view) with radial glial fascicles from the VZ to the frontal, temporal, parietal, and occipital lobes. Note the direct, unobstructed, orthogonal trajectory. **c**: Diffusion tractography (lateral view) of the radial glial fascicles from the VZ to insula. In addition to the fascicle curving around the lenticular nuclei, there is a second fascicle traveling obliquely from the temporal horn to the posterior-inferior insula. **d**: Diffusion tractography (lateral view) of the radial glial fascicles from the VZ to the other lobes. Again, note the direct, orthogonal pathway. **e**:

Radiality(30) at the subplate. Note the significantly lower radiality in the insula compared to the other lobes, suggesting an oblique direction for radial glial fascicles reaching the insula. *Left*: GA Week 26, *Right*: GA week 30. **f**: Diffusion tractography shape analysis(31) - curl (total length divided by Euclidean distance between termini) by GA. Curl is significantly higher for fascicles reaching the insula than the other lobes. Linear regression against side, GA, and lobe was significant with moderate overall fit ( $R^2 = 0.540$ ,  $F(6,83)=18.41$ ,  $p<0.0001$ ). Mean curl was significantly smaller for fascicles going to the frontal, temporal, parietal, and occipital lobes than to the insula ( $p<0.001$ ). **g**: Diffusion tractography shape analysis - elongation (total length divided by tract diameter) by GA. Elongation is significantly higher for fascicles reaching the insula than the other lobes. Linear regression against side, GA, and lobe was significant with good overall fit ( $R^2 = 0.747$ ,  $F(6,83)=44.71$ ,  $p<0.0001$ ). Mean elongation was significantly smaller for fascicles going to the frontal, temporal, parietal, and occipital lobes than to the insula ( $p<0.001$ ). **h**: Radiality at the subplate by GA. Linear regression against side, GA, and lobe was significant with high overall fit ( $R^2 = 0.838$ ,  $F(6,83)=77.62$ ,  $p<0.0001$ ). Radiality was significantly higher for the frontal, temporal, parietal, and occipital lobes than the insula ( $p<0.001$ ).

**Figure 4: A novel mechanism for insular development and the formation of the global geometry of the cerebrum.** The lobes of the cerebral convexity (frontal, parietal, temporal, occipital) form via direct radial migration along radial glial scaffolds (blue). In contrast, a direct radial pathway from the ventricular zone to the insula is obstructed by the lenticular nuclei. Consequently, neural progenitor cells travel along a curved and oblique scaffold around the lenticular nuclei to the insula. Accordingly, insular gyri have an altered geometry and the insula expands at a significantly lower rate than the other lobes. This relative overgrowth of the operculae closes the Sylvian fissure, buries the insula, and defines the global configuration of the cerebral lobes.

## Supplementary Materials

Materials and Methods

Fig. S1-6

Tables S1-3

References (46-55)



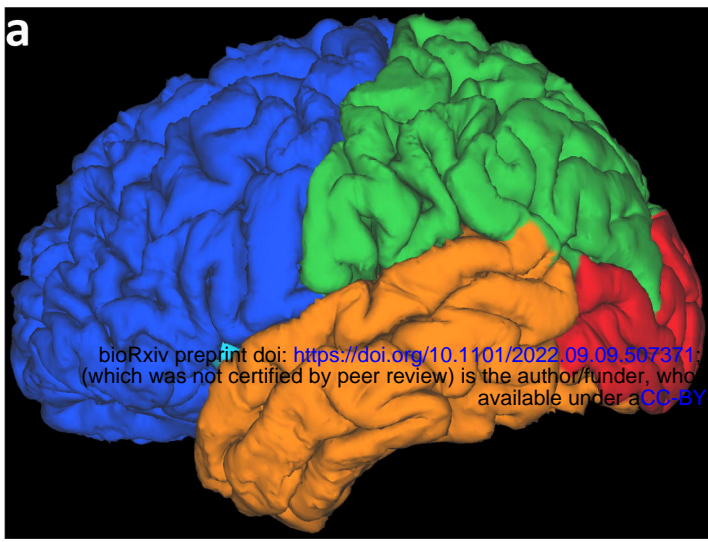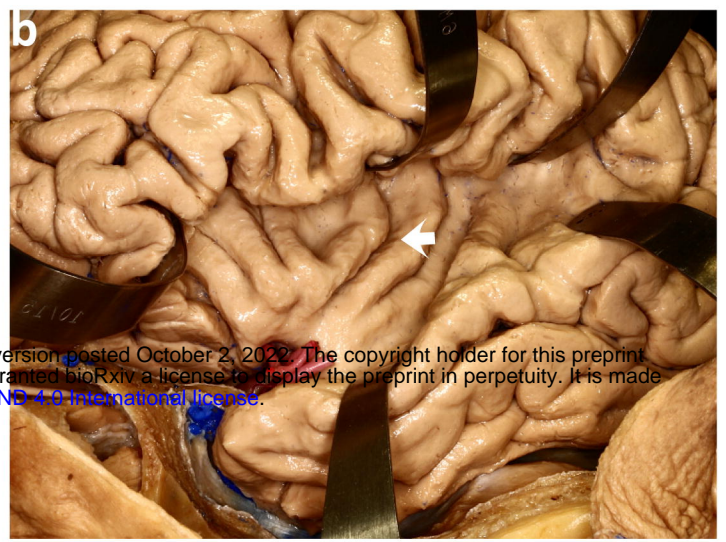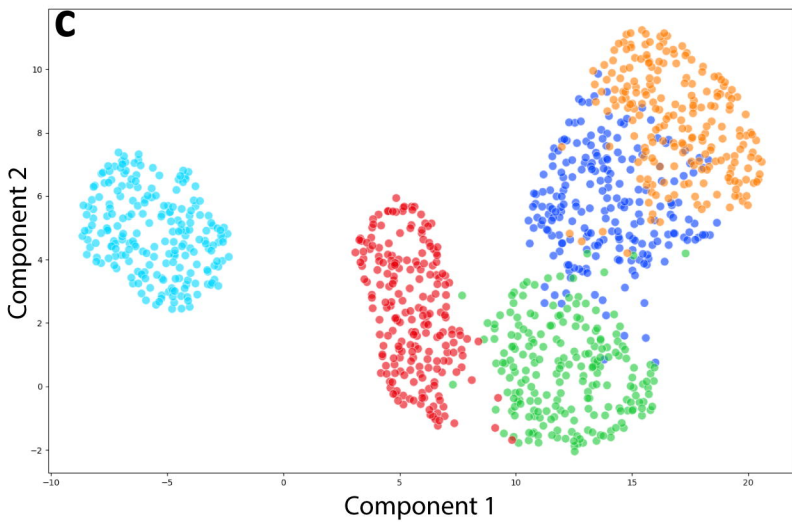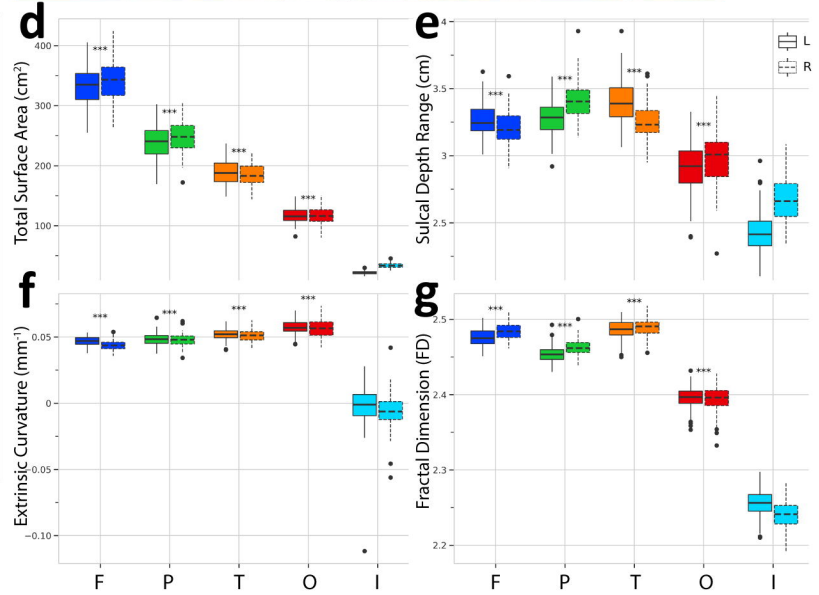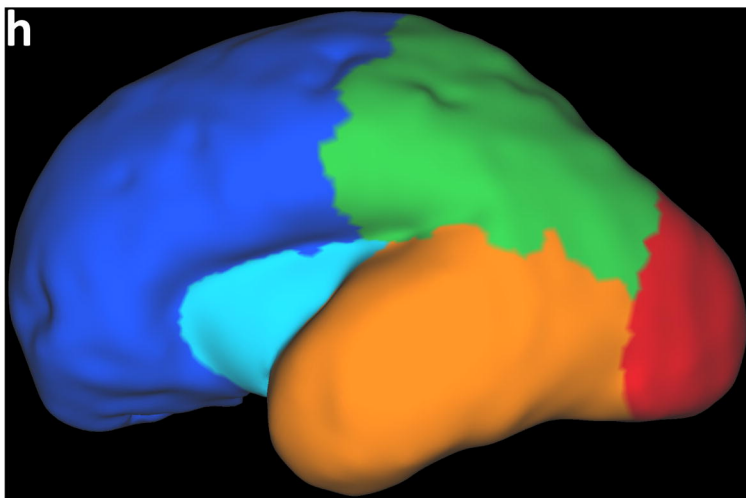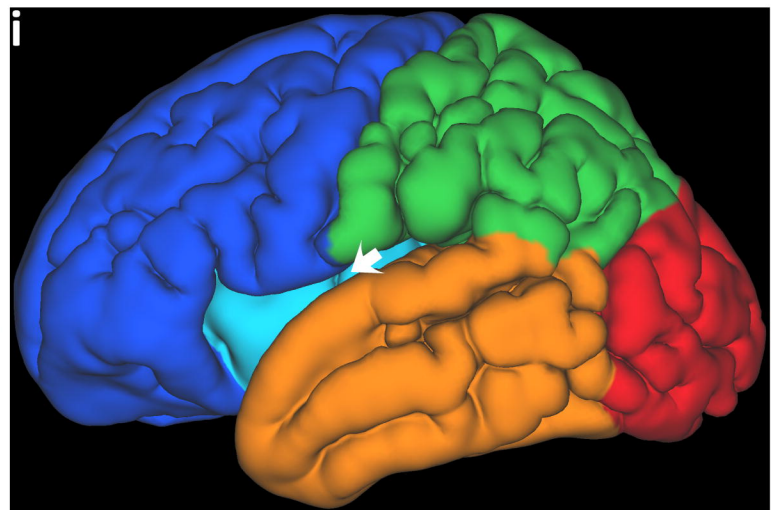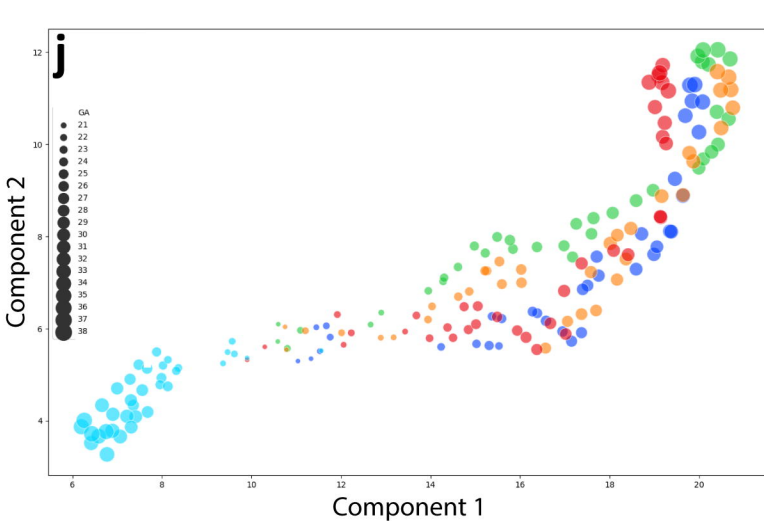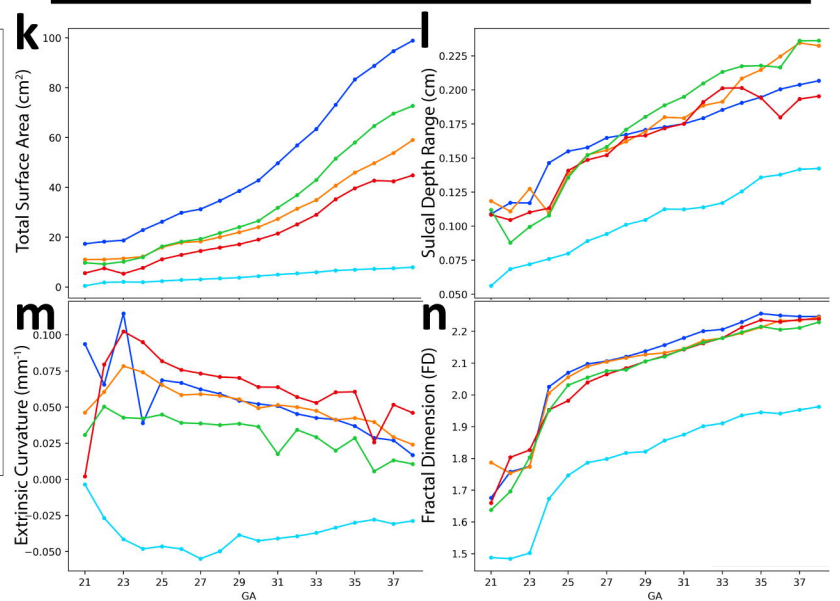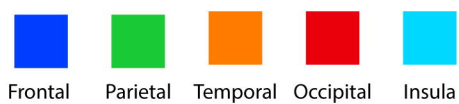

**3D**

**Axial**

**Spherical**

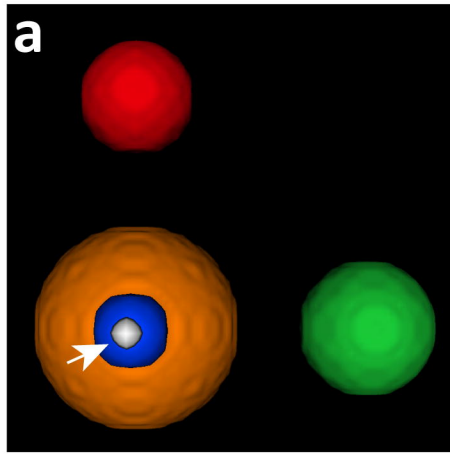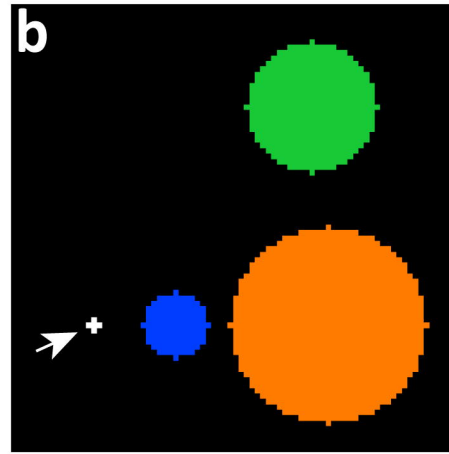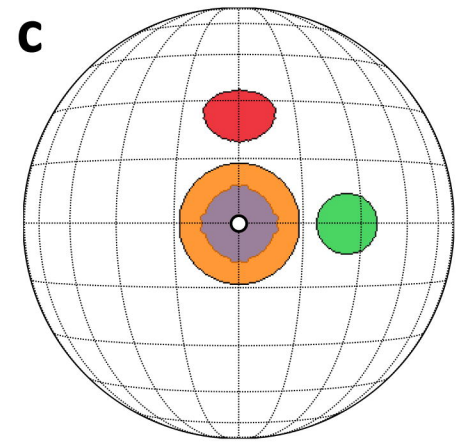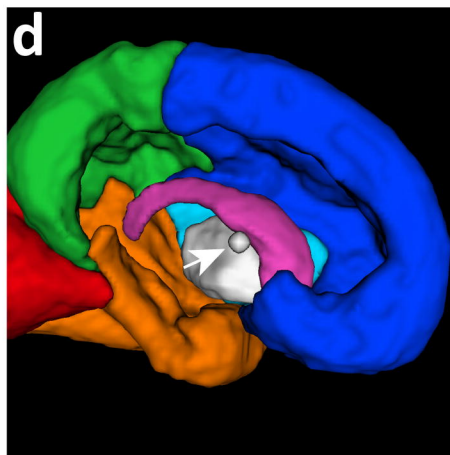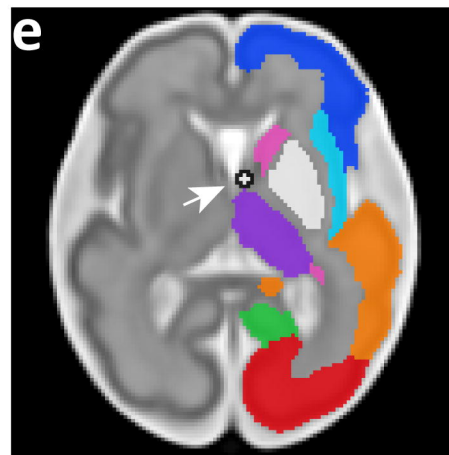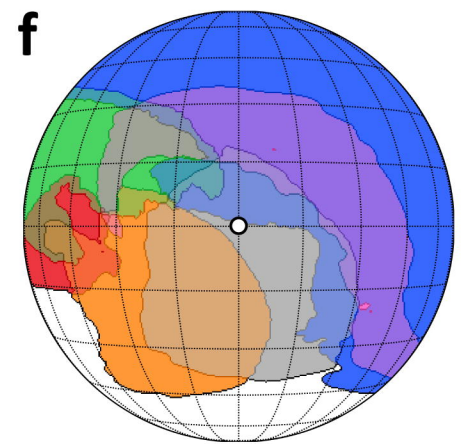

**g**

**GA 24**

**GA 30**

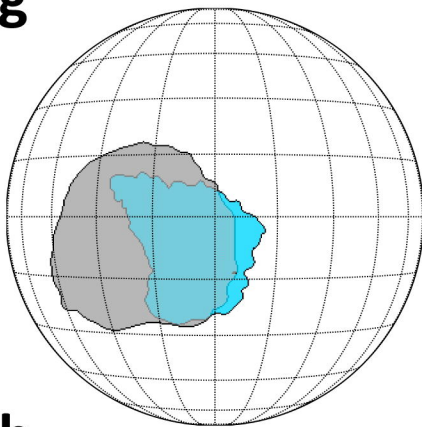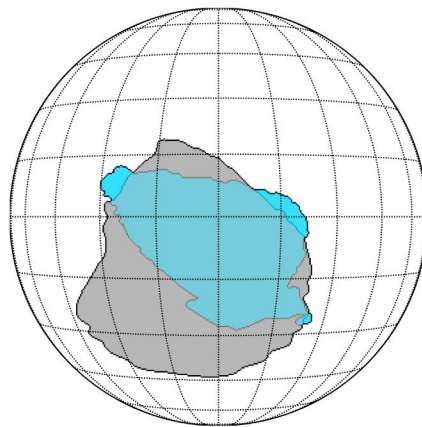

**i**

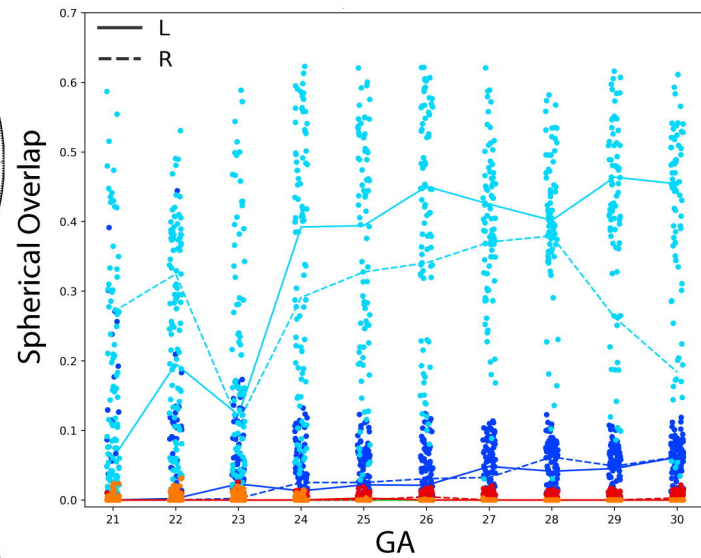

**h**

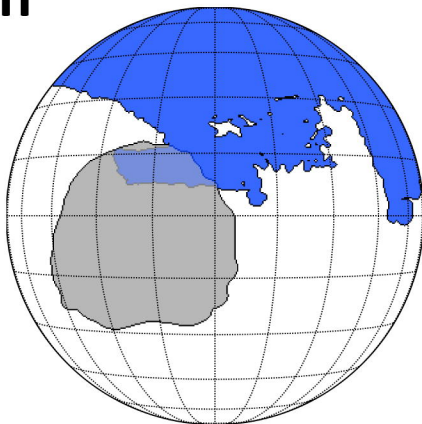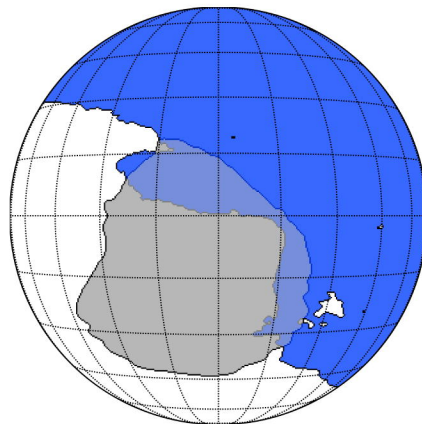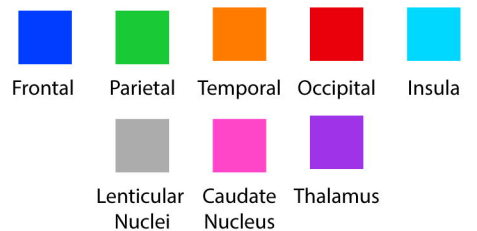



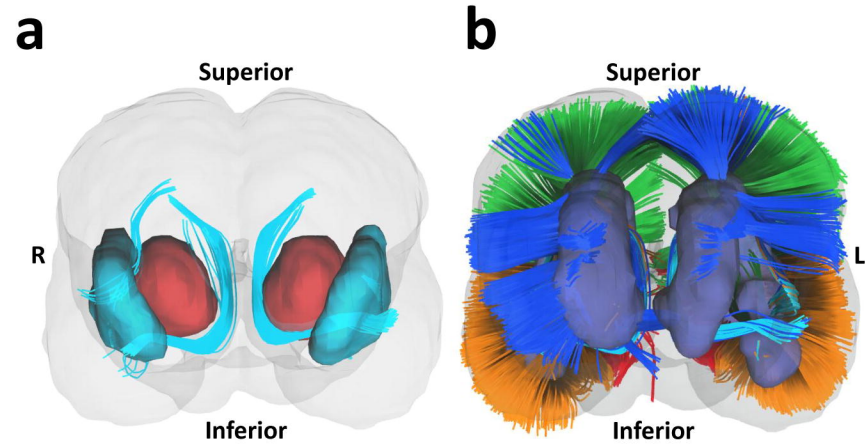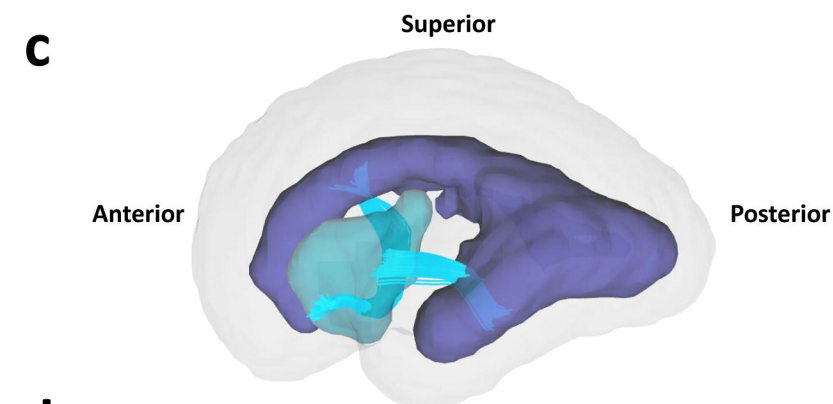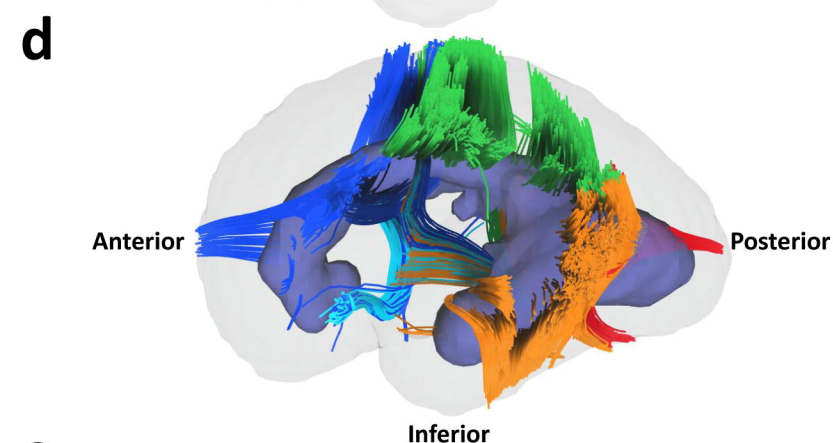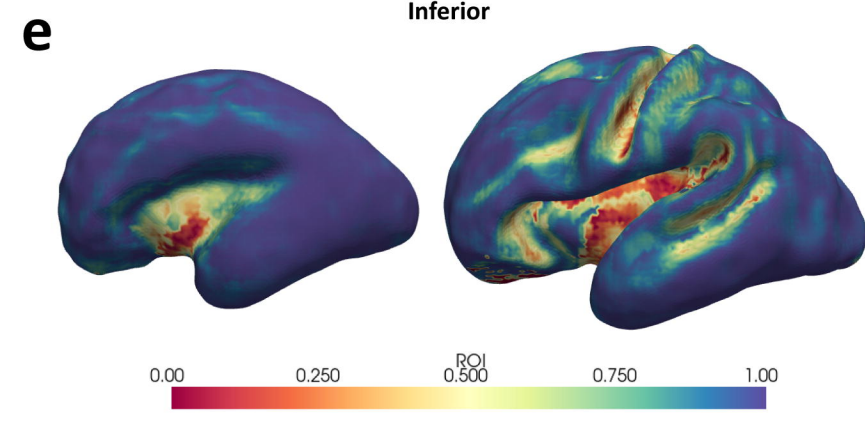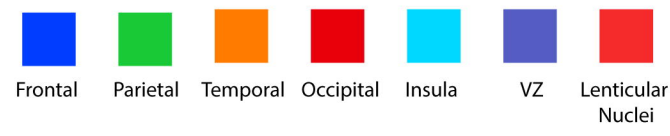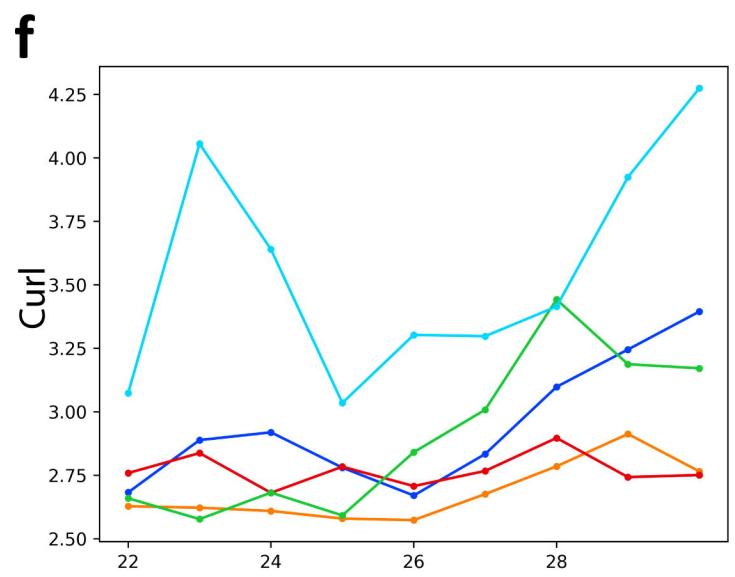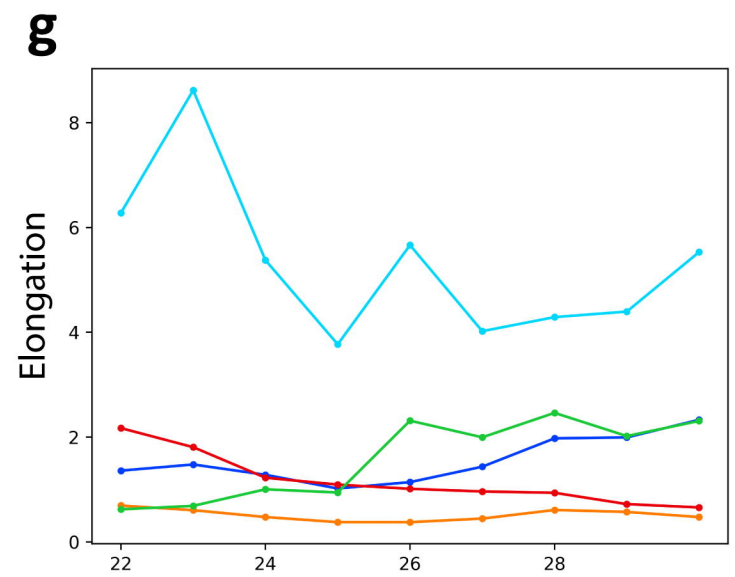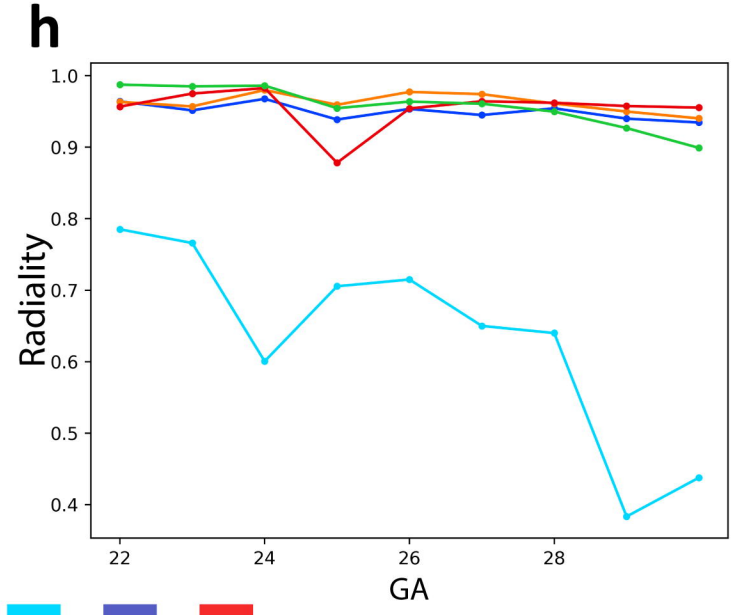

GA

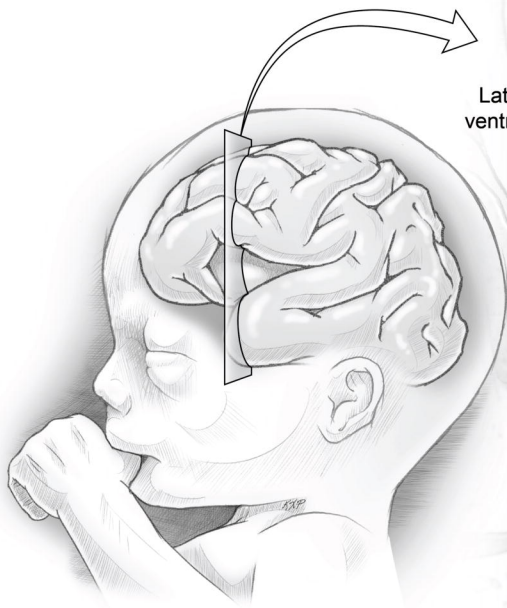

Lateral  
ventricle

SVZ

LGE

MGE

Lenticular  
nucleus

Internal capsule

Insular gyrus

K.A. Probst

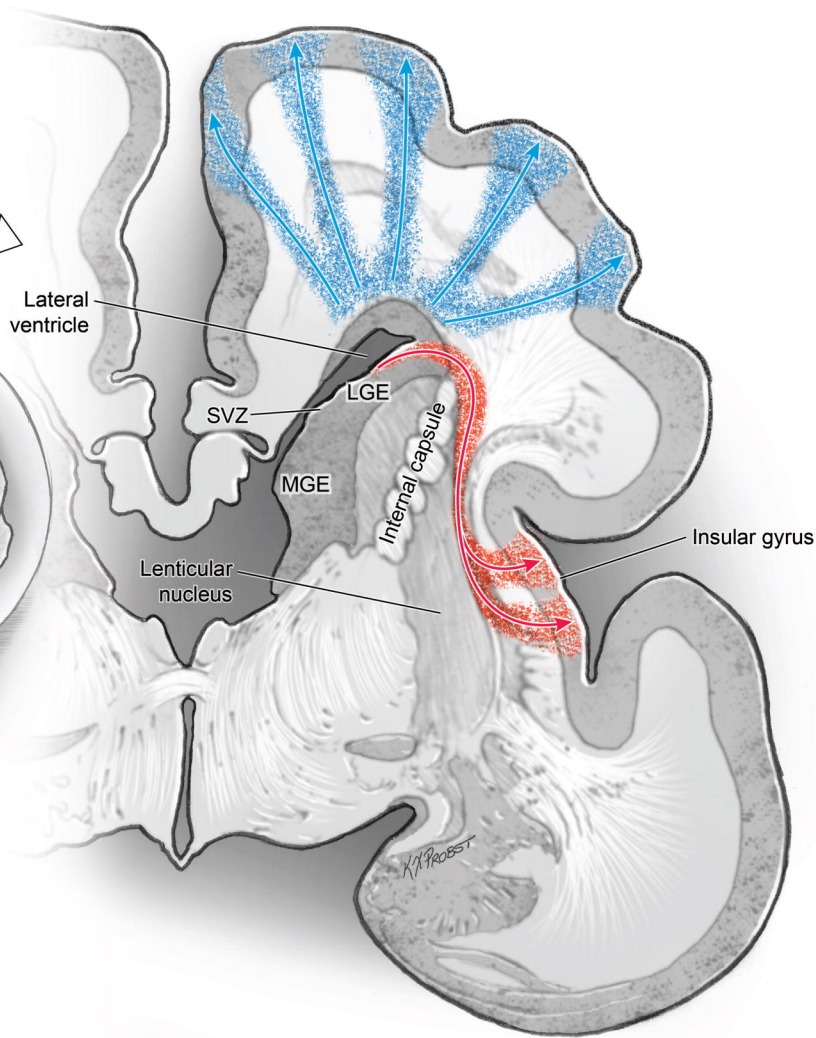

Source: https://www.biorxiv.org/content/10.1101/2022.09.09.507371v2.full.pdf
